# Supplementary material
Source: Springer Nature journal article supplement (https://www.springermedizin.de/resource/supplementary/13075_2009_2719_MOESM1_ESM.pdf/9692740)
Supplement: MOESM1 [file 9692740]

### **Item Identification**

1,860 items identified from extensive, systematic searches

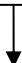

### **Item Classification and Selection “Binning and Winnowing”**

Items organized into conceptual “bins” and reduced to a set reflecting the physical function latent trait for further testing.

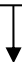

### **Item Review and Revision**

Items evaluated by experts and by subjects for clarity, relevance, comprehension, and coverage of the physical function latent trait by survey, focus groups, and cognitive interviews and revised based on findings.

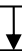

### **Large-Scale Field Testing**

168 newly developed physical function items tested in 21,133 subjects from the general U.S. population and selected clinical samples.

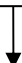

### **Item Quantitative Evaluation**

125-item PROMIS physical function item bank resulted from IRT analyses.
